# Supplementary material for: CRF-based models of protein surfaces improve protein-protein interaction site predictions
Source: Springer Nature journal article supplement (doi:10.1186/1471-2105-15-277), 2014-08-13

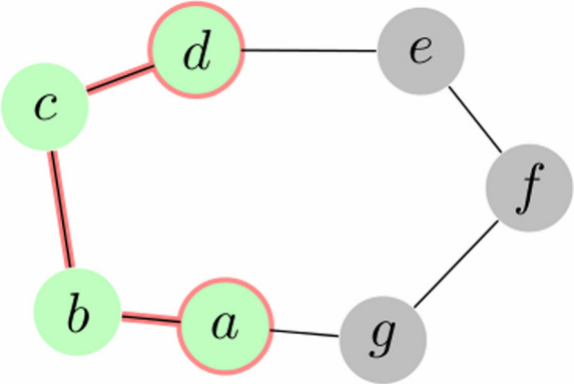

Supplement: 12859_2013_6548_MOESM1_ESM.pdf [file 12859_2013_6548_MOESM1_ESM.pdf]
